# Supplementary material
Source: MDPI journal article supplement (https://www.mdpi.com/2071-1050/9/8/1387)
Supplement: s1 [file s1]

## Supplementary

### S1. Experts in fields

**Table S1.** Experts in fields

| Item | Fields              | number |
|------|---------------------|--------|
| 1    | Sediment management | 5      |
| 2    | Flood control       | 7      |
| 3    | River ecology       | 4      |
| 4    | Water resources     | 7      |
| 5    | Water quality       | 4      |
| 6    | Social benefit      | 3      |
| 7    | policy              | 6      |

**Note:** some experts have background in two fields.

## S2. Lower and upper values of indicators

**Table S2.** literatures for lower and upper values of indicators

|                            |                                                                                                                                                                                                                                                      |
|----------------------------|------------------------------------------------------------------------------------------------------------------------------------------------------------------------------------------------------------------------------------------------------|
| <b>Sediment management</b> | Water Resources Agency, Ministry of Economic Affairs. Reservoir Sediment Releasing Countermeasures Cope with Climate Change(1/2), <b>2010</b> .                                                                                                      |
|                            | Water Resources Agency, Ministry of Economic Affairs. The 2009 Evaluation Study of the Sediment Deposition Potential for Taiwan's Reservoirs, <b>2010</b> .                                                                                          |
|                            | Graf, W.L.; Wohl, E.; Sinha, T.; Sabo, J.L. Sedimentation and sustainability of western american reservoirs. <i>Water Resour Res</i> <b>2010</b> , 46.                                                                                               |
|                            | Halcrow. Sedimentation in Storage Reservoirs, Final Report to Department of the Environment, Transport and the Regions, <b>2001</b> .                                                                                                                |
|                            | Atkinson, E. The feasibility of flushing sediment from reservoirs. <b>1996</b> . , HR Wallingford Report OD137.                                                                                                                                      |
| <b>Flood control</b>       | Thompson, H A., Pitt, K J Lewin, W P Longmire, Jr (1984). "Sclerosing cholangitis and histiocytosis X. " <i>Gut</i> <b>1984</b> ; 25:526-530 doi:10.1136/gut.25.5.526.                                                                               |
|                            | Water Resources Agency, Ministry of Economic Affairs. Enforcement Rules for Water Act, 2011, Article 139.                                                                                                                                            |
|                            | Geng, L.H.; Liu, H.; Zhong, H.P.; Liu, C.S. Indicators and criteria for evaluation of healthy rivers [j]. <i>Journal of Hydraulic Engineering</i> <b>2006</b> , 3, 253-258.                                                                          |
| <b>River ecology</b>       | Hsieh, C.L. Flood early warning model in real-time reservoir operation. Doctor Thesis. National Taiwan Ocean University, Keelung, Taiwan, <b>2010</b> .                                                                                              |
|                            | Ladson, A. R., White L.J., Doolan J.A., Finlayson B.L., Hart B.T., Lake P.S., and Tilleard J.W. Development and Testing of an Index of Stream Condition for Waterway Management in Australia. <i>Freshwater Biology</i> . <b>1999</b> , 41: 453-468. |
|                            | Ohio Environmental Protection Agency. 1989. Biological Criteria for the Protection of Aquatic Life                                                                                                                                                   |
| <b>Water quality</b>       | United States Environmental Protection Agency , 1989,Rapid Bioassessment Protocols<br><a href="https://www.epa.gov.tw">https://www.epa.gov.tw</a>                                                                                                    |
|                            | Ouyang, C.H., Liao, S.L., Lin, K. C., Lian, Y. C., Methods of evaluation River pollution, Environmental Protection Agency, <b>1995</b> .                                                                                                             |
|                            | Zhou, J. C., Wen, Q.G. Development of river water quality index in Taiwan, Master thesis, National Cheng-Kung University,1990.                                                                                                                       |
|                            | Weiss, S. J., Peppin, G., Ortiz, X., Ragsdale, C. & Test, S. T. <i>Science</i> <b>1985</b> , 227, 747-769.                                                                                                                                           |
| <b>Water resources</b>     | Water Resources Agency, Ministry of Economic Affairs. The assessment and computation of the indicators on sustainable development of water resources in Taiwan(in Chinese); Taipei, Taiwan, <b>2004</b> .                                            |
|                            | Huang, W.C.; Chou, C.C. Risk-based drought early warning system in reservoir operation. <i>Adv Water Resour</i> <b>2008</b> , 31, 649-660.                                                                                                           |
|                            | Water Resources Agency, Ministry of Economic Affairs. drought disaster planning (in Chinese); Taipei, Taiwan, <b>2008</b> .                                                                                                                          |

### S3. Weight Distribution Analysis Survey

#### “Integrated evaluation on the sustainability and decision-making support system of reservoirs” weight distribution analysis survey

##### Objectives

In recent years, natural causes and anthropogenic activities have collectively compromised the functionality of reservoirs in Taiwan, resurfacing the already precarious situation of water resources. Reservoirs, one of the main water supplying resources, account for the supply of one fourth of the total water consumption nationwide in Taiwan. They are indispensable in supporting economic development as well as promoting the conservation of ecological environment of downstream area. This leads to several concerns crucial to the future of water resources in Taiwan that need to be considered: are existing reservoirs able to supply water sustainably? Are the designs of new reservoirs in line with the sustainability agenda? While acknowledging the importance of these issues, there is much to be done, through quantitative evaluation index and analysis, to determine if reservoirs are able to support the goal of sustainability, and how existing and newly built reservoirs differ in terms of sustainability evaluation.

We envision a sustainable reservoir as “in its design and management, operate on a basin-to-basin basis, to fulfill the present and future social needs while maintaining the ideal condition of it surrounding ecology, environment and hydrology.” It is necessary to take environmental protection, economic development and social justice into account when evaluating the sustainability of reservoirs. The analysis will be carried out focusing on regional sediment management, systemic flood control, river ecology conservation, regional distribution of water resources, maintaining optimal water quality, effectiveness and fairness. With these six focused areas comes twelve sub-areas as analytical indexes. To look into the complex relations of the competition, cooperation and dependency between these areas and indexes, we proposed, besides considering the overall model development, to also use ANP survey to engage diversified opinions from experts.

##### Index Definition

Table S3. Definitions of indices

| Area                       | Evaluation index             | Goal                                                                                                                                                                                              |
|----------------------------|------------------------------|---------------------------------------------------------------------------------------------------------------------------------------------------------------------------------------------------|
| <b>Sediment management</b> | Effective reservoir capacity | Calculate the reservoir volume availability and observe the volume changes to see deposit condition, function debilitation, and sediment removal.                                                 |
|                            | Sediment supply              | By calculating the reservoir sediment-shifting rate, analyze if the sediment is provided steadily to maintain river and coastline intact, and be account for the deposit condition in reservoirs. |
| <b>flood control</b>       | Flood reduction              | To evaluate if the reservoirs are designed to lower inflow peak volume in terms of reservoir total volume and flood control mechanism                                                             |
|                            | Safe flooding flow           | To evaluate if the downstream river is able to accommodate the outflow peak volume from reservoirs                                                                                                |
| <b>River ecology</b>       | Ecological baseflow          | To analyze the level of species diversity in catchment area, and predict water volume and quality trend in that area                                                                              |
|                            | Change in WUA                | To analyze habitat changes before reservoirs are                                                                                                                                                  |



#### S4. Calculations of indicators

**Table S4.** Calculations of indicator C<sub>2</sub>

| Category       | Indicator          | Calculated Index                 |
|----------------|--------------------|----------------------------------|
| C <sub>2</sub> | I <sub>3</sub> (%) | 80.11<br>(49.61) *<br>(Table S5) |
|                | I <sub>4</sub> (%) | 62.25<br>(13.5) *<br>(Table S6)  |

**Table S5.** Effective reservoir capacity

| Year | Without desilting                                    |                          | With desilting                                       |                          |
|------|------------------------------------------------------|--------------------------|------------------------------------------------------|--------------------------|
|      | Available capacity (10 <sup>4</sup> m <sup>3</sup> ) | reservoir capacity ratio | Available capacity (10 <sup>4</sup> m <sup>3</sup> ) | reservoir capacity ratio |
| 1    | 6977.20                                              | 99.49%                   | 6999.00                                              | 99.80%                   |
| 10   | 6655.60                                              | 94.90%                   | 6873.10                                              | 98.01%                   |
| 20   | 6298.80                                              | 89.82%                   | 6733.30                                              | 96.01%                   |
| 30   | 5942.70                                              | 84.74%                   | 6593.60                                              | 94.02%                   |
| 40   | 5587.30                                              | 79.67%                   | 6453.90                                              | 92.03%                   |
| 50   | 5232.70                                              | 74.61%                   | 6314.40                                              | 90.04%                   |
| 60   | 4879.20                                              | 69.57%                   | 6174.90                                              | 88.05%                   |
| 70   | 4526.80                                              | 64.55%                   | 6035.60                                              | 86.06%                   |
| 80   | 4175.90                                              | 59.55%                   | 5896.30                                              | 84.08%                   |
| 90   | 3826.50                                              | 54.56%                   | 5757.20                                              | 82.09%                   |
| 100  | 3479.10                                              | <b>49.61%*</b>           | 5618.20                                              | <b>80.11%*</b>           |

**Table S6.** Sediment supply ratio

| Year | Without desilting                                        |                       | With desilting                                           |                       |
|------|----------------------------------------------------------|-----------------------|----------------------------------------------------------|-----------------------|
|      | Sediment to downstream (10 <sup>4</sup> m <sup>3</sup> ) | Sediment supply ratio | Sediment to downstream (10 <sup>4</sup> m <sup>3</sup> ) | Sediment supply ratio |
| 1    | 4.20                                                     | 10.50%                | 26.00                                                    | 65.00%                |
| 10   | 4.30                                                     | 10.75%                | 26.00                                                    | 65.00%                |
| 20   | 4.30                                                     | 10.75%                | 26.00                                                    | 65.00%                |
| 30   | 4.40                                                     | 11.00%                | 26.00                                                    | 65.00%                |
| 40   | 4.50                                                     | 11.25%                | 26.00                                                    | 65.00%                |
| 50   | 4.60                                                     | 11.50%                | 26.00                                                    | 65.00%                |
| 60   | 4.70                                                     | 11.75%                | 26.10                                                    | 65.25%                |
| 70   | 4.80                                                     | 12.00%                | 26.10                                                    | 65.25%                |
| 80   | 5.00                                                     | 12.50%                | 26.10                                                    | 65.25%                |
| 90   | 5.10                                                     | 12.75%                | 26.10                                                    | 65.25%                |
| 100  | 5.40                                                     | <b>13.50%*</b>        | 26.10                                                    | <b>65.25%*</b>        |

**Table S7.** Daily water supply volume estimates of reservoir operations (Unit: 10<sup>4</sup> Cubic meter)

| Year    | Reservoir runoff | Water for desilting | Available water | Release flow |             |          | ET  | Overflow | Shortage | Days of shortage | Water storage |
|---------|------------------|---------------------|-----------------|--------------|-------------|----------|-----|----------|----------|------------------|---------------|
|         |                  |                     |                 | Domestic     | Agriculture | Baseflow |     |          |          |                  |               |
| 1962    | 16,186           | 7,660               | 6,754           | 6,527        | 1,622       | 225      | 115 | 0        | 773      | 41               | 3,391         |
| 1963    | 8,862            | 1,835               | 5,438           | 6,859        | 1,381       | 239      | 106 | 0        | 441      | 24               | 1,865         |
| 1964    | 8,079            | 0                   | 6,099           | 5,427        | 1,735       | 245      | 75  | 0        | 1,893    | 98               | 2,461         |
| 1965    | 13,057           | 3,470               | 7,654           | 6,487        | 1,740       | 240      | 113 | 0        | 813      | 42               | 3,516         |
| 1966    | 20,144           | 8,967               | 9,274           | 7,300        | 1,721       | 248      | 160 | 737      | 0        | 0                | 4,592         |
| 1967    | 11,303           | 0                   | 9,053           | 7,300        | 1,998       | 253      | 179 | 803      | 0        | 0                | 5,363         |
| 1968    | 20,525           | 8,897               | 9,487           | 7,320        | 1,991       | 255      | 179 | 2,255    | 0        | 0                | 5,096         |
| 1969    | 12,217           | 1,480               | 8,767           | 7,300        | 1,730       | 255      | 173 | 1,379    | 0        | 0                | 5,011         |
| 1970    | 10,200           | 2,293               | 5,764           | 7,300        | 1,916       | 258      | 149 | 0        | 0        | 0                | 3,326         |
| 1971    | 13,115           | 3,439               | 7,906           | 7,255        | 1,565       | 250      | 125 | 0        | 45       | 3                | 3,852         |
| 1972    | 27,984           | 14,956              | 11,399          | 7,320        | 1,509       | 245      | 159 | 3,677    | 0        | 0                | 4,095         |
| 1973    | 15,167           | 5,920               | 7,176           | 7,300        | 1,944       | 215      | 147 | 0        | 0        | 0                | 3,824         |
| 1974    | 26,044           | 3,956               | 19,788          | 7,300        | 2,107       | 226      | 174 | 10,207   | 0        | 0                | 5,931         |
| 1975    | 16,849           | 1,998               | 12,525          | 7,300        | 2,102       | 254      | 188 | 5,711    | 0        | 0                | 5,257         |
| 1976    | 17,057           | 9,953               | 5,510           | 7,320        | 1,442       | 252      | 166 | 0        | 0        | 0                | 3,282         |
| 1977    | 22,515           | 5,199               | 15,233          | 7,300        | 1,914       | 231      | 163 | 6,142    | 0        | 0                | 4,909         |
| 1978    | 10,029           | 939                 | 7,531           | 7,300        | 1,328       | 246      | 160 | 486      | 0        | 0                | 4,495         |
| 1979    | 14,446           | 3,984               | 9,014           | 7,300        | 1,274       | 220      | 155 | 1,662    | 0        | 0                | 4,392         |
| 1980    | 3,507            | 0                   | 2,570           | 6,862        | 751         | 187      | 99  | 0        | 458      | 24               | 0             |
| 1981    | 17,995           | 10,275              | 5,897           | 4,023        | 1,673       | 244      | 69  | 0        | 3,277    | 164              | 1,805         |
| 1982    | 16,630           | 5,543               | 9,480           | 6,821        | 1,428       | 270      | 125 | 159      | 479      | 24               | 4,180         |
| 1983    | 13,334           | 1,607               | 10,114          | 7,300        | 1,345       | 271      | 182 | 2,619    | 0        | 0                | 4,193         |
| 1984    | 7,782            | 0                   | 6,417           | 7,320        | 1,129       | 237      | 147 | 0        | 0        | 0                | 3,142         |
| 1985    | 19,625           | 2,442               | 15,360          | 7,300        | 1,624       | 216      | 161 | 6,265    | 0        | 0                | 4,777         |
| 1986    | 13,519           | 755                 | 11,264          | 7,300        | 1,257       | 259      | 181 | 4,006    | 0        | 0                | 4,553         |
| 1987    | 16,334           | 3,083               | 11,616          | 7,300        | 1,454       | 225      | 171 | 3,310    | 0        | 0                | 5,388         |
| 1988    | 11,788           | 2,664               | 7,468           | 7,320        | 1,436       | 265      | 180 | 604      | 0        | 0                | 4,752         |
| 1989    | 11,487           | 1,120               | 8,759           | 7,300        | 1,375       | 247      | 168 | 1,349    | 0        | 0                | 4,695         |
| 1990    | 19,009           | 3,600               | 13,684          | 7,300        | 1,516       | 257      | 180 | 6,192    | 0        | 0                | 4,707         |
| 1991    | 13,729           | 887                 | 11,062          | 7,300        | 1,525       | 256      | 173 | 3,240    | 0        | 0                | 5,056         |
| 1992    | 13,078           | 4,751               | 6,642           | 7,320        | 1,474       | 272      | 168 | 0        | 0        | 0                | 4,211         |
| 1993    | 2,819            | 0                   | 1,978           | 6,096        | 606         | 235      | 92  | 0        | 1,204    | 62               | 0             |
| 1994    | 15,462           | 2,030               | 11,849          | 4,860        | 1,364       | 251      | 109 | 2,523    | 2,440    | 123              | 4,357         |
| 1995    | 6,668            | 0                   | 5,476           | 7,300        | 960         | 232      | 147 | 0        | 0        | 0                | 2,385         |
| 1996    | 10,822           | 3,421               | 6,081           | 6,904        | 1,158       | 209      | 94  | 0        | 416      | 23               | 1,469         |
| 1997    | 19,053           | 5,304               | 11,933          | 6,428        | 1,592       | 271      | 131 | 1,938    | 872      | 45               | 4,905         |
| 1998    | 14,206           | 3,301               | 9,300           | 7,300        | 1,335       | 271      | 186 | 1,372    | 0        | 0                | 5,347         |
| 1999    | 18,866           | 2,504               | 14,411          | 7,300        | 1,749       | 248      | 187 | 7,296    | 0        | 0                | 4,975         |
| 2000    | 16,045           | 2,790               | 11,354          | 7,320        | 1,673       | 272      | 176 | 3,277    | 0        | 0                | 5,556         |
| 2001    | 25,731           | 9,220               | 14,532          | 7,300        | 1,811       | 267      | 190 | 7,740    | 0        | 0                | 4,858         |
| 2002    | 8,500            | 0                   | 7,116           | 7,300        | 1,119       | 266      | 172 | 439      | 0        | 0                | 4,063         |
| 2003    | 12,564           | 1,674               | 9,363           | 7,300        | 1,275       | 269      | 166 | 915      | 0        | 0                | 5,045         |
| 2004    | 11,139           | 1,729               | 7,926           | 7,320        | 1,274       | 241      | 166 | 0        | 0        | 0                | 5,485         |
| 2005    | 22,528           | 10,790              | 9,957           | 7,300        | 1,590       | 256      | 185 | 3,132    | 0        | 0                | 4,826         |
| 2006    | 13,758           | 2,776               | 9,420           | 7,300        | 1,355       | 253      | 175 | 2,741    | 0        | 0                | 4,030         |
| 2007    | 18,970           | 2,803               | 14,356          | 7,300        | 1,614       | 228      | 160 | 5,265    | 0        | 0                | 5,660         |
| Average | 14,755           | 3,696               | 9,343           | 7,020        | 1,510       | 246      | 153 | 2,118    | 285      | 15               | 4,110         |

**Note:** ET: Evapotranspiration. Once the planned water supply is 20.0x10<sup>4</sup> Cubic meter/day (CMD), the shortage Index (SI)=1.0.

$$SI = \frac{100}{N} \times \sum_{i=1}^N \left( \frac{SA_i}{DA} \right)^2$$

where  $SA_i$  is water volume of shortage in  $i$ th year; and  $DA$  is the planned water supply.
